# Supplementary material for: Revealing Shared and Distinct Genes Responding to JA and SA Signaling in Arabidopsis by Meta-Analysis
Source: Front Plant Sci. 2020 Jun 26;11:908. doi: 10.3389/fpls.2020.00908 (PMC7333171; doi:10.3389/fpls.2020.00908)
Supplement: TABLE S8 — The genes exhibited crossed differential expression patterns toward JA/SA analogs and bio/necrotrophic pathogens. The genes were repressed by SA but induced by JA and biotrophic pathogens, or repressed by JA but induced by SA and necrotrophic pathogens. [file Table_8.xlsx]

## Sheet: Pto DC3000& JA↑，SA↓
Gene_ID	Family	TransID	Biotype	curated annotation	description
AT1G11580		ATPMEPCRA	protein_coding	response to bacterium	methylesterase PCR A [Source:TAIR%3BAcc:AT1G11580]
AT1G19570		DHAR1	protein_coding	cellular response to hydrogen peroxide	Glutathione S-transferase DHAR1%2C mitochondrial [Source:UniProtKB/Swiss-Prot%3BAcc:Q9FWR4]
AT1G19670		CLH1	protein_coding	Defense	CORI1 [Source:UniProtKB/TrEMBL%3BAcc:A0A178W1X2]
AT1G24070		CSLA10	protein_coding	cell wall organization	Probable mannan synthase 10 [Source:UniProtKB/Swiss-Prot%3BAcc:Q9LR87]
AT1G26770		ATEXPA10	protein_coding	plant-type cell wall loosening	Expansin A10 [Source:UniProtKB/TrEMBL%3BAcc:F4HPC1]
AT1G44790		GGCT2%3B3	protein_coding	glutathione catabolic process	Gamma-glutamylcyclotransferase 2-3 [Source:UniProtKB/Swiss-Prot%3BAcc:Q84QC1]
AT1G52030		F-ATMBP	protein_coding	defense response to insect	Myrosinase-binding protein 2 [Source:UniProtKB/Swiss-Prot%3BAcc:Q9SAV1]
AT1G52040		MBP1	protein_coding	defense response to insect	Myrosinase-binding protein 1 [Source:UniProtKB/Swiss-Prot%3BAcc:Q9SAV0]
AT1G52400		BGLU18	protein_coding	abscisic acid metabolic process	Beta-D-glucopyranosyl abscisate beta-glucosidase [Source:UniProtKB/Swiss-Prot%3BAcc:Q9SE50]
AT1G52410		TSA1	protein_coding	photomorphogenesis	TSK-associating protein 1 [Source:UniProtKB/Swiss-Prot%3BAcc:F4ICX9]
AT1G52720			protein_coding	unknown	At1g52720 [Source:UniProtKB/TrEMBL%3BAcc:Q9SSS6]
AT1G55210		DIR20	protein_coding	unknown	Dirigent protein 20 [Source:UniProtKB/Swiss-Prot%3BAcc:Q9C891]
AT1G62660		BFRUCT3	protein_coding	Defense	Acid beta-fructofuranosidase 3%2C vacuolar [Source:UniProtKB/Swiss-Prot%3BAcc:Q43348]
AT1G64200		VHA-E3	protein_coding	proton-transporting ATPase activity	vacuolar H+-ATPase subunit E isoform 3 [Source:TAIR%3BAcc:AT1G64200]
AT1G67865			protein_coding	defense response to fungus	At1g67862/At1g67862 [Source:UniProtKB/TrEMBL%3BAcc:Q941E9]
AT1G69370		CM3	protein_coding	defense response to bacterium	CM3 [Source:UniProtKB/TrEMBL%3BAcc:A0A178WB66]
AT1G70700		JAZ9	protein_coding	response to jasmonic acid	TIFY domain/Divergent CCT motif family protein [Source:UniProtKB/TrEMBL%3BAcc:A0A1P8API7]
AT1G76790		IGMT5	protein_coding	indole glucosinolate biosynthetic process	IGMT5 [Source:UniProtKB/TrEMBL%3BAcc:A0A178WFJ3]
AT2G22330		CYP79B3	protein_coding	defense response	cytochrome P450%2C family 79%2C subfamily B%2C polypeptide 3 [Source:TAIR%3BAcc:AT2G22330]
AT2G37180		PIP2-3	protein_coding	response to osmotic stress	Aquaporin PIP2-3 [Source:UniProtKB/Swiss-Prot%3BAcc:P30302]
AT2G38750		ANN4	protein_coding	response to abscisic acid	Annexin D4 [Source:UniProtKB/Swiss-Prot%3BAcc:Q9ZVJ6]
AT2G43540			protein_coding	unknown	At2g43540 [Source:UniProtKB/TrEMBL%3BAcc:O22868]
AT2G46650		CYTB5-C	protein_coding	unknown	Cytochrome B5 isoform C [Source:UniProtKB/Swiss-Prot%3BAcc:Q9ZNV4]
AT3G09260		BGLU23	protein_coding	glucosinolate catabolic process	PYK10 [Source:UniProtKB/TrEMBL%3BAcc:A0A178VCN3]
AT3G12145		FLR1	protein_coding	regulation of timing of transition from vegetative to reproductive phase	FTM4 [Source:UniProtKB/TrEMBL%3BAcc:A0A178V9V7]
AT3G15950		NAI2	protein_coding	ER body organization	TSA1-like protein [Source:UniProtKB/Swiss-Prot%3BAcc:Q9LSB4]
AT3G16400		NSP1	protein_coding	response to herbivore	Nitrile-specifier protein 1 [Source:UniProtKB/Swiss-Prot%3BAcc:Q9SDM9]
AT3G16420		PBP1	protein_coding	regulation of hydrolase activity	PYK10-binding protein 1 [Source:UniProtKB/Swiss-Prot%3BAcc:O04314]
AT3G16470		JAL35	protein_coding	vegetative to reproductive phase transition of meristem	Jacalin-related lectin 35 [Source:UniProtKB/Swiss-Prot%3BAcc:O04309]
AT3G23570			protein_coding	unknown	Alpha/beta-Hydrolases superfamily protein [Source:UniProtKB/TrEMBL%3BAcc:Q94JY3]
AT3G25760		AOC1	protein_coding	jasmonic acid biosynthetic process	At3g25760 [Source:UniProtKB/TrEMBL%3BAcc:Q2HIV2]
AT3G28220			protein_coding	unknown	AT3g28220/T19D11_3 [Source:UniProtKB/TrEMBL%3BAcc:Q9LHA6]
AT3G56200			protein_coding	amino acid transmembrane transport	AT3g56200/F18O21_160 [Source:UniProtKB/TrEMBL%3BAcc:Q9LYM2]
AT4G15440		CYP74B2	protein_coding	response to wounding	Probable inactive linolenate hydroperoxide lyase [Source:UniProtKB/Swiss-Prot%3BAcc:B3LF83]
AT4G17470			protein_coding	protein modification process	At4g17470 [Source:UniProtKB/TrEMBL%3BAcc:Q501G7]
AT4G18440			protein_coding	de novo' IMP biosynthetic process	Adenylosuccinate lyase [Source:UniProtKB/TrEMBL%3BAcc:Q8RY94]
AT4G21790		TOM1	protein_coding	viral replication complex formation and maintenance	Tobamovirus multiplication protein 1 [Source:UniProtKB/Swiss-Prot%3BAcc:Q9FEG2]
AT4G21910			protein_coding	unknown	MATE efflux family protein [Source:TAIR%3BAcc:AT4G21910]
AT4G23600		CORI3	protein_coding	Defense	Cystine lyase CORI3 [Source:UniProtKB/Swiss-Prot%3BAcc:Q9SUR6]
AT4G24350			protein_coding	Phosphorylase family protein	Phosphorylase family protein [Source:UniProtKB/TrEMBL%3BAcc:Q94K59]
AT4G27560		UGT79B2	protein_coding	unknown	Glycosyltransferase [Source:UniProtKB/TrEMBL%3BAcc:A0A178UV98]
AT4G30530		GGP1	protein_coding	camalexin biosynthetic process	Gamma-glutamyl peptidase 1 [Source:UniProtKB/Swiss-Prot%3BAcc:Q9M0A7]
AT5G23820			protein_coding	Defense	AT5g23820/MRO11_14 [Source:UniProtKB/TrEMBL%3BAcc:Q9FF98]
AT5G24420		PGL5	protein_coding	pentose-phosphate shunt, oxidative branch	Probable 6-phosphogluconolactonase 3 [Source:UniProtKB/Swiss-Prot%3BAcc:Q8LEV7]
AT5G24770		VSP2	protein_coding	defense response to insect	Vegetative storage protein 2 [Source:UniProtKB/Swiss-Prot%3BAcc:O82122]
AT5G24780		VSP1	protein_coding	response to jasmonic acid	Vegetative storage protein 1 [Source:UniProtKB/Swiss-Prot%3BAcc:O49195]
AT5G42650		DDE2	protein_coding	jasmonic acid biosynthetic process	Allene oxide synthase%2C chloroplastic [Source:UniProtKB/Swiss-Prot%3BAcc:Q96242]
AT5G44720			protein_coding	unknown	Molybdenum cofactor sulfurase family protein [Source:UniProtKB/TrEMBL%3BAcc:O48588]
AT5G47240		atnudt8	protein_coding	response to wounding	nudix hydrolase homolog 8 [Source:TAIR%3BAcc:AT5G47240]
AT5G55120		VTC5	protein_coding	L-ascorbic acid biosynthetic process	VTC5 [Source:UniProtKB/TrEMBL%3BAcc:A0A178UIM1]
AT5G65870		PSK5	protein_coding	cell differentiation	Phytosulfokines 5 [Source:UniProtKB/Swiss-Prot%3BAcc:Q9FEB4]

## Sheet: P. rapae& B. cinerea& SA ↑,JA↓ 
Gene_ID	Family	TransID	Biotype	curated annotation	description
AT1G01560		MPK11	protein_coding	MAP kinase activity	Mitogen-activated protein kinase 11 [Source:UniProtKB/Swiss-Prot%3BAcc:Q9LMM5]
AT1G02930		GSTF6	protein_coding	defense response to bacterium	Glutathione S-transferase F6 [Source:UniProtKB/Swiss-Prot%3BAcc:P42760]
AT1G04200			protein_coding	unknown	Putative uncharacterized protein At1g04200 [Source:UniProtKB/TrEMBL%3BAcc:Q8RWV1]
AT1G07000		ATEXO70B2	protein_coding	Defense	EXO70B2 [Source:UniProtKB/TrEMBL%3BAcc:A0A178WCB5]
AT1G07630		PLL5	protein_coding	leaf development	PLL5 [Source:UniProtKB/TrEMBL%3BAcc:A0A178WGF5]
AT1G09200		HTR2	protein_coding	unknown	Histone H3.2 [Source:UniProtKB/Swiss-Prot%3BAcc:P59226]
AT1G09560		GLP4	protein_coding	regulation of root development	Germin-like protein subfamily 2 member 1 [Source:UniProtKB/Swiss-Prot%3BAcc:P94014]
AT1G10050			protein_coding	xylan catabolic process	glycosyl hydrolase family 10 protein / carbohydrate-binding domain-containing protein [Source:TAIR%3BAcc:AT1G10050]
AT1G13470			protein_coding	unknown	Protein of unknown function (DUF1262) [Source:TAIR%3BAcc:AT1G13470]
AT1G16090		WAKL7	protein_coding	response to wounding	Wall associated kinase-like 7 [Source:UniProtKB/TrEMBL%3BAcc:F4I2T5]
AT1G21240		WAK3	protein_coding	protein phosphorylation	Wall-associated receptor kinase 3 [Source:UniProtKB/Swiss-Prot%3BAcc:Q9LMN8]
AT1G21250		WAK1	protein_coding	defense response to fungus	Wall-associated receptor kinase 1 [Source:UniProtKB/Swiss-Prot%3BAcc:Q39191]
AT1G22180			protein_coding	unknown	F16L1.9 protein [Source:UniProtKB/TrEMBL%3BAcc:Q9LM14]
AT1G23710			protein_coding	unknown	At1g23710 [Source:UniProtKB/TrEMBL%3BAcc:Q9ZUC4]
AT1G24150		ATFH4	protein_coding	defense response by cell wall thickening	formin homologue 4 [Source:TAIR%3BAcc:AT1G24150]
AT1G27100			protein_coding	unknown	Actin cross-linking protein [Source:UniProtKB/TrEMBL%3BAcc:Q0WQH3]
AT1G30755			protein_coding	unknown	Putative uncharacterized protein At1g30750 [Source:UniProtKB/TrEMBL%3BAcc:Q8L5Y3]
AT1G50740		FAX5	protein_coding	unknown	Protein FATTY ACID EXPORT 5 [Source:UniProtKB/Swiss-Prot%3BAcc:Q9C6T7]
AT1G55450			protein_coding	unknown	S-adenosyl-L-methionine-dependent methyltransferases superfamily protein [Source:UniProtKB/TrEMBL%3BAcc:F4I0B5]
AT1G61250		SCAMP3	protein_coding	unknown	Secretory carrier-associated membrane protein 3 [Source:UniProtKB/Swiss-Prot%3BAcc:Q9M5P2]
AT1G61260			protein_coding	unknown	Protein of unknown function (DUF761) [Source:TAIR%3BAcc:AT1G61260]
AT1G63840			protein_coding	response to abscisic acid	At1g63840/T12P18_14 [Source:UniProtKB/TrEMBL%3BAcc:Q9CAJ8]
AT1G65690		NHL6	protein_coding	positive regulation of abscisic acid biosynthetic process	NDR1/HIN1-like protein 6 [Source:UniProtKB/Swiss-Prot%3BAcc:Q8LD98]
AT1G66090			protein_coding	TIR-NBS	Disease resistance protein%2C putative [Source:UniProtKB/TrEMBL%3BAcc:Q9C515]
AT1G67360			protein_coding	developmental vegetative growth	REF/SRPP-like protein At1g67360 [Source:UniProtKB/Swiss-Prot%3BAcc:Q9FYF7]
AT1G67850			protein_coding	unknown	AT1G67850 protein [Source:UniProtKB/TrEMBL%3BAcc:Q94F37]
AT1G70740			protein_coding	phosphorylation	At1g70740 [Source:UniProtKB/TrEMBL%3BAcc:B4F7N6]
AT1G72910			protein_coding	TIR-NBS	Similar to part of disease resistance protein [Source:UniProtKB/TrEMBL%3BAcc:Q9SSN5]
AT1G73805		SARD1	protein_coding	salicylic acid biosynthetic process	SARD1 [Source:UniProtKB/TrEMBL%3BAcc:A0A178WFY4]
AT1G74360			protein_coding	RLK genes	Probable LRR receptor-like serine/threonine-protein kinase At1g74360 [Source:UniProtKB/Swiss-Prot%3BAcc:C0LGJ1]
AT1G75040		PR5	protein_coding	defense response	Pathogenesis-related protein 5 [Source:UniProtKB/Swiss-Prot%3BAcc:P28493]
AT1G76040		CPK29	protein_coding	abscisic acid-activated signaling pathway	calcium-dependent protein kinase 29 [Source:TAIR%3BAcc:AT1G76040]
AT1G76970			protein_coding	unknown	At1g76970 [Source:UniProtKB/TrEMBL%3BAcc:Q6NQK0]
AT1G76980			protein_coding	unknown	At1g76980 [Source:UniProtKB/TrEMBL%3BAcc:O49284]
AT2G01180		ATPAP1	protein_coding	response to UV-B	phosphatidic acid phosphatase 1 [Source:TAIR%3BAcc:AT2G01180]
AT2G02010		GAD4	protein_coding	glutamate catabolic process	glutamate decarboxylase 4 [Source:TAIR%3BAcc:AT2G02010]
AT2G11520		CRCK3	protein_coding	protein autophosphorylation	Calmodulin-binding receptor-like cytoplasmic kinase 3 [Source:UniProtKB/Swiss-Prot%3BAcc:Q9ASQ5]
AT2G13790		SERK4	protein_coding	RLK genes	Somatic embryogenesis receptor kinase 4 [Source:UniProtKB/Swiss-Prot%3BAcc:Q9SKG5]
AT2G14560		LURP1	protein_coding	defense response to fungus	Protein of unknown function (DUF567) [Source:TAIR%3BAcc:AT2G14560]
AT2G16870			protein_coding	TIR-NBS-LRR	Disease resistance protein (TIR-NBS-LRR class)%2C putative [Source:UniProtKB/TrEMBL%3BAcc:Q9ZVX6]
AT2G16900			protein_coding	unknown	Expressed protein [Source:UniProtKB/TrEMBL%3BAcc:Q9ZVX3]
AT2G17040	NAC	anac036	protein_coding	negative regulation of cell size	NAC domain containing protein 36 [Source:UniProtKB/TrEMBL%3BAcc:F4IME8]
AT2G17120		LYM2	protein_coding	defense response	LYP1 [Source:UniProtKB/TrEMBL%3BAcc:A0A178VYE4]
AT2G17220		PIX13	protein_coding	defense response	Probable serine/threonine-protein kinase PIX13 [Source:UniProtKB/Swiss-Prot%3BAcc:Q9SII6]
AT2G18660		EGC2	protein_coding	systemic acquired resistance	EG45-like domain containing protein 2 [Source:UniProtKB/Swiss-Prot%3BAcc:Q9ZV52]
AT2G18690			protein_coding	unknown	Expressed protein [Source:UniProtKB/TrEMBL%3BAcc:Q9ZV49]
AT2G20142			protein_coding	unknown	Toll-Interleukin-Resistance domain-containing protein [Source:UniProtKB/TrEMBL%3BAcc:F4IUF0]
AT2G26190		IQM4	protein_coding	response to abscisic acid	IQ domain-containing protein IQM4 [Source:UniProtKB/Swiss-Prot%3BAcc:O64851]
AT2G28080		UGT86A2	protein_coding	UDP-glycosyltransferase activity	UDP-glycosyltransferase 86A2 [Source:UniProtKB/Swiss-Prot%3BAcc:Q9ZUV0]
AT2G29350		SAG13	protein_coding	defense response to insect	SAG13 [Source:UniProtKB/TrEMBL%3BAcc:A0A178VTS8]
AT2G31880		SOBIR1	protein_coding	RLK genes	Leucine-rich repeat receptor-like serine/threonine/tyrosine-protein kinase SOBIR1 [Source:UniProtKB/Swiss-Prot%3BAcc:Q9SKB2]
AT2G33580		LYK5	protein_coding	innate immune response	Protein LYK5 [Source:UniProtKB/Swiss-Prot%3BAcc:O22808]
AT2G34355			protein_coding	transmembrane transport	At2g34355 [Source:UniProtKB/TrEMBL%3BAcc:Q501E0]
AT2G36580			protein_coding	glycolytic process	Pyruvate kinase [Source:UniProtKB/TrEMBL%3BAcc:A0A178VX82]
AT2G37710		LECRK41	protein_coding	defense response	L-type lectin-domain containing receptor kinase IV.1 [Source:UniProtKB/Swiss-Prot%3BAcc:O80939]
AT2G37940		IPCS2	protein_coding	sphingolipid biosynthetic process	ERH1 [Source:UniProtKB/TrEMBL%3BAcc:A0A178VV03]
AT2G38290		AMT2	protein_coding	response to nematode	Ammonium transporter 2 [Source:UniProtKB/Swiss-Prot%3BAcc:Q9M6N7]
AT2G39710			protein_coding	proteolysis	Cysteine-rich peptide family protein [Source:UniProtKB/TrEMBL%3BAcc:O22282]
AT2G40095			protein_coding	unknown	Alpha/beta hydrolase related protein [Source:UniProtKB/TrEMBL%3BAcc:Q8GZ10]
AT2G41010		CAMBP25	protein_coding	regulation of salicylic acid metabolic process	Calmodulin-binding protein 25 [Source:UniProtKB/Swiss-Prot%3BAcc:O80683]
AT2G41110		CAM2	protein_coding	pollen germination	Calmodulin 2 [Source:UniProtKB/TrEMBL%3BAcc:F4IJ46]
AT2G41835	C2H2	SAP11	protein_coding	unknown	Zinc finger AN1 and C2H2 domain-containing stress-associated protein 11 [Source:UniProtKB/Swiss-Prot%3BAcc:Q8VZ42]
AT2G41880		GK-1	protein_coding	gametophyte development	guanylate kinase 1 [Source:TAIR%3BAcc:AT2G41880]
AT2G46400	WRKY	WRKY46	protein_coding	defense response to bacterium	Probable WRKY transcription factor 46 [Source:UniProtKB/Swiss-Prot%3BAcc:Q9SKD9]
AT2G46430		CNGC3	protein_coding	signaling pathways leading to HR/resistance	Probable cyclic nucleotide-gated ion channel 3 [Source:UniProtKB/Swiss-Prot%3BAcc:Q9SKD7]
AT2G47730		GSTF8	protein_coding	glutathione binding	Glutathione S-transferase F8%2C chloroplastic [Source:UniProtKB/Swiss-Prot%3BAcc:Q96266]
AT3G01290		HIR3	protein_coding	response to oomycetes	HIR2 [Source:UniProtKB/TrEMBL%3BAcc:A0A178V7M0]
AT3G03310		LCAT3	protein_coding	lipid catabolic process	LCAT3 [Source:UniProtKB/TrEMBL%3BAcc:A0A178V4V2]
AT3G07390		AIR12	protein_coding	auxin-activated signaling pathway	AIR12 [Source:UniProtKB/TrEMBL%3BAcc:A0A178VEI7]
AT3G09010			protein_coding	phosphorylation	Protein kinase superfamily protein [Source:UniProtKB/TrEMBL%3BAcc:Q8LF75]
AT3G09350		Fes1A	protein_coding	response to salt stress	Fes1A [Source:UniProtKB/TrEMBL%3BAcc:Q84J81]
AT3G11650		NHL2	protein_coding	defense response to virus	NDR1/HIN1-like protein 2 [Source:UniProtKB/Swiss-Prot%3BAcc:Q9SRN1]
AT3G11820		SYP121	protein_coding	defense response to fungus	SYR1 [Source:UniProtKB/TrEMBL%3BAcc:A0A178VIM4]
AT3G12830		SAUR72	protein_coding	auxin-activated signaling pathway	Auxin-responsive protein SAUR72 [Source:UniProtKB/Swiss-Prot%3BAcc:Q9LTV3]
AT3G13940			protein_coding	RNA polymerase I preinitiation complex assembly	DNA binding / DNA-directed RNA polymerase [Source:UniProtKB/TrEMBL%3BAcc:Q9LVK6]
AT3G20600		NDR1	protein_coding	defense response to bacterium	Protein NDR1 [Source:UniProtKB/Swiss-Prot%3BAcc:O48915]
AT3G22235			protein_coding	unknown	Cysteine-rich TM module stress tolerance protein [Source:UniProtKB/TrEMBL%3BAcc:Q8W472]
AT3G22600			protein_coding	lipid transport	AT3g22600/F16J14_17 [Source:UniProtKB/TrEMBL%3BAcc:Q9LJ86]
AT3G23530			protein_coding	oxidation-reduction process	AT3g23510/MEE5_5 [Source:UniProtKB/TrEMBL%3BAcc:Q8VZH1]
AT3G25600		CML16	protein_coding	unknown	Probable calcium-binding protein CML16 [Source:UniProtKB/Swiss-Prot%3BAcc:Q9LI84]
AT3G28450		BIR2	protein_coding	RLK genes	Inactive LRR receptor-like serine/threonine-protein kinase BIR2 [Source:UniProtKB/Swiss-Prot%3BAcc:Q9LSI9]
AT3G44190			protein_coding	oxidation-reduction process	At3g44190 [Source:UniProtKB/TrEMBL%3BAcc:Q9LXP4]
AT3G44400			protein_coding	TIR-NBS-LRR	Disease resistance protein (TIR-NBS-LRR class) family [Source:UniProtKB/TrEMBL%3BAcc:Q9M285]
AT3G45090			protein_coding	unknown	P-loop NTPase domain-containing protein LPA1 homolog 2 [Source:UniProtKB/Swiss-Prot%3BAcc:Q93ZS1]
AT3G47090			protein_coding	RLK genes	Leucine-rich repeat protein kinase family protein [Source:UniProtKB/TrEMBL%3BAcc:Q9SD64]
AT3G48090		EDS1	protein_coding	systemic acquired resistance	Protein EDS1 [Source:UniProtKB/Swiss-Prot%3BAcc:Q9SU72]
AT3G51160		MUR1	protein_coding	unidimensional cell growth	GDP-mannose 4%2C6 dehydratase 2 [Source:UniProtKB/Swiss-Prot%3BAcc:P93031]
AT3G52930		FBA8	protein_coding	response to karrikin	Fructose-bisphosphate aldolase [Source:UniProtKB/TrEMBL%3BAcc:A0A178V8L4]
AT3G54810	GATA	GATA8	protein_coding	circadian rhythm	GATA transcription factor 8 [Source:UniProtKB/Swiss-Prot%3BAcc:Q9SV30]
AT3G56880			protein_coding	response to salt stress	Putative uncharacterized protein At3g56880 [Source:UniProtKB/TrEMBL%3BAcc:Q9LES0]
AT3G57630			protein_coding	protein glycosylation	At3g57630 [Source:UniProtKB/TrEMBL%3BAcc:Q6NKR6]
AT4G01370		MPK4	protein_coding	systemic acquired resistance	Mitogen-activated protein kinase 4 [Source:UniProtKB/Swiss-Prot%3BAcc:Q39024]
AT4G01950		ATGPAT3	protein_coding	cutin biosynthetic process	glycerol-3-phosphate acyltransferase 3 [Source:TAIR%3BAcc:AT4G01950]
AT4G02200			protein_coding	unknown	Protein dehydration-INDUCED 19-5 [Source:UniProtKB/TrEMBL%3BAcc:F4JH94]
AT4G02410		LECRK43	protein_coding	defense response	L-type lectin-domain containing receptor kinase IV.3 [Source:UniProtKB/Swiss-Prot%3BAcc:O81292]
AT4G02890		UBQ14	protein_coding	protein ubiquitination	Polyubiquitin [Source:UniProtKB/TrEMBL%3BAcc:J7FN14]
AT4G03450			protein_coding	regulation of defense response	Ankyrin repeat-containing protein [Source:UniProtKB/TrEMBL%3BAcc:Q9ZT73]
AT4G03820			protein_coding	unknown	Protein of unknown function (DUF3537) [Source:TAIR%3BAcc:AT4G03820]
AT4G11000			protein_coding	unknown	Ankyrin repeat family protein [Source:TAIR%3BAcc:AT4G11000]
AT4G11850		PLDGAMMA1	protein_coding	defense response	Phospholipase D gamma 1 [Source:UniProtKB/Swiss-Prot%3BAcc:Q9T053]
AT4G11890			protein_coding	regulation of abscisic acid-activated signaling pathway	Protein kinase family protein [Source:UniProtKB/TrEMBL%3BAcc:F4JPT7]
AT4G14365		XBAT34	protein_coding	protein ubiquitination	Putative E3 ubiquitin-protein ligase XBAT34 [Source:UniProtKB/Swiss-Prot%3BAcc:Q9FPH0]
AT4G17030		EXLB1	protein_coding	sexual reproduction	Expansin-like protein [Source:UniProtKB/TrEMBL%3BAcc:Q0WRS3]
AT4G18253			protein_coding	unknown	Receptor Serine/Threonine kinase-like protein [Source:UniProtKB/TrEMBL%3BAcc:A0A1P8B6P8]
AT4G18880	HSF	HSFA4A	protein_coding	response to reactive oxygen species	Heat stress transcription factor A-4a [Source:UniProtKB/Swiss-Prot%3BAcc:O49403]
AT4G19520			protein_coding	TIR-NBS-LRR	TIR-NBS-LRR class disease resistance protein [Source:UniProtKB/TrEMBL%3BAcc:F4JT82]
AT4G23180		CRK10	protein_coding	defense response to bacterium	Cysteine-rich receptor-like protein kinase 10 [Source:UniProtKB/Swiss-Prot%3BAcc:Q8GYA4]
AT4G23190		CRK11	protein_coding	defense response to bacterium	Cysteine-rich receptor-like protein kinase 11 [Source:UniProtKB/Swiss-Prot%3BAcc:Q9ZP16]
AT4G23220		CRK14	protein_coding	unknown	Cysteine-rich receptor-like protein kinase 14 [Source:UniProtKB/Swiss-Prot%3BAcc:Q8H199]
AT4G23250		EMB1290	protein_coding	protein autophosphorylation	kinases%3Bprotein kinases [Source:TAIR%3BAcc:AT4G23250]
AT4G23810	WRKY	WRKY53	protein_coding	defense response to bacterium	Probable WRKY transcription factor 53 [Source:UniProtKB/Swiss-Prot%3BAcc:Q9SUP6]
AT4G24160			protein_coding	lipid homeostasis	1-acylglycerol-3-phosphate O-acyltransferase [Source:UniProtKB/Swiss-Prot%3BAcc:O22975]
AT4G27260		GH3.5	protein_coding	indole-3-acetic acid amido synthetase activity	Indole-3-acetic acid-amido synthetase GH3.5 [Source:UniProtKB/Swiss-Prot%3BAcc:O81829]
AT4G28400			protein_coding	protein dephosphorylation	Probable protein phosphatase 2C 58 [Source:UniProtKB/Swiss-Prot%3BAcc:Q93YW5]
AT4G28490		RLK5	protein_coding	RLK genes	Receptor-like protein kinase 5 [Source:UniProtKB/Swiss-Prot%3BAcc:P47735]
AT5G02490		MED37D	protein_coding	cellular response to heat	Probable mediator of RNA polymerase II transcription subunit 37c [Source:UniProtKB/Swiss-Prot%3BAcc:P22954]
AT5G04720		ADR1-L2	protein_coding	NBS	Probable disease resistance protein At5g04720 [Source:UniProtKB/Swiss-Prot%3BAcc:Q9LZ25]
AT5G09420		OM64	protein_coding	protein targeting to mitochondrion	Outer envelope protein 64%2C mitochondrial [Source:UniProtKB/Swiss-Prot%3BAcc:F4KCL7]
AT5G15870			protein_coding	unknown	Glycosyl hydrolase family 81 protein [Source:UniProtKB/TrEMBL%3BAcc:Q9LFT3]
AT5G19240			protein_coding	unknown	Uncharacterized GPI-anchored protein At5g19240 [Source:UniProtKB/Swiss-Prot%3BAcc:Q84VZ5]
AT5G19250			protein_coding	unknown	Uncharacterized GPI-anchored protein At5g19250 [Source:UniProtKB/Swiss-Prot%3BAcc:P59833]
AT5G25250		FLOT1	protein_coding	membrane invagination	Flotillin-like protein 1 [Source:UniProtKB/Swiss-Prot%3BAcc:Q501E6]
AT5G25440			protein_coding	positive regulation of defense response to bacterium	Protein kinase superfamily protein [Source:TAIR%3BAcc:AT5G25440]
AT5G26920		CBP60G	protein_coding	regulation of salicylic acid biosynthetic process	Calmodulin-binding protein 60 G [Source:UniProtKB/Swiss-Prot%3BAcc:F4K2R6]
AT5G27420		ATL31	protein_coding	defense response to bacterium	E3 ubiquitin-protein ligase ATL31 [Source:UniProtKB/Swiss-Prot%3BAcc:Q8LGA5]
AT5G41750			protein_coding	TIR-NBS-LRR	Disease resistance protein-like [Source:UniProtKB/TrEMBL%3BAcc:Q9LSX5]
AT5G44070		PCS1	protein_coding	defense response by callose deposition in cell wall	PCS1 [Source:UniProtKB/TrEMBL%3BAcc:A0A178UMN4]
AT5G44568			protein_coding	defense response	Putative uncharacterized protein [Source:UniProtKB/TrEMBL%3BAcc:Q570K8]
AT5G45100		BRG1	protein_coding	regulation of programmed cell death	BOI-related E3 ubiquitin-protein ligase 1 [Source:UniProtKB/Swiss-Prot%3BAcc:Q9FHE4]
AT5G45750		RABA1C	protein_coding	cell wall biogenesis	RABA1c [Source:UniProtKB/TrEMBL%3BAcc:A0A178UDB2]
AT5G47070		PBL19	protein_coding	unknown	Probable serine/threonine-protein kinase PBL19 [Source:UniProtKB/Swiss-Prot%3BAcc:Q9LTC0]
AT5G48380		BIR1	protein_coding	RLK genes	Probably inactive leucine-rich repeat receptor-like protein kinase At5g48380 [Source:UniProtKB/Swiss-Prot%3BAcc:Q9ASS4]
AT5G48657			protein_coding	unknown	defense protein-related [Source:TAIR%3BAcc:AT5G48657]
AT5G52750		HIPP13	protein_coding	unknown	Heavy metal-associated isoprenylated plant protein 13 [Source:UniProtKB/Swiss-Prot%3BAcc:Q9LTE2]
AT5G52760		HIPP14	protein_coding	unknown	Heavy metal-associated isoprenylated plant protein 14 [Source:UniProtKB/Swiss-Prot%3BAcc:Q9LTE1]
AT5G54840		SGP1	protein_coding	unknown	SGP1 [Source:UniProtKB/TrEMBL%3BAcc:A0A178UAS3]
AT5G54860			protein_coding	unknown	Probable folate-biopterin transporter 4 [Source:UniProtKB/Swiss-Prot%3BAcc:Q8RWQ5]
AT5G55400		FIM3	protein_coding	actin filament bundle assembly	Fimbrin-3 [Source:UniProtKB/Swiss-Prot%3BAcc:Q9FJ70]
AT5G56030		HSP81-2	protein_coding	chaperone-mediated protein complex assembly	Heat shock protein 81-2 [Source:UniProtKB/TrEMBL%3BAcc:F4K6B6]
AT5G59870		HTA6	protein_coding	chromatin organization	Probable histone H2A.7 [Source:UniProtKB/Swiss-Prot%3BAcc:Q9FJE8]
AT5G61600	ERF	ERF104	protein_coding	defense response to fungus	Ethylene-responsive transcription factor ERF104 [Source:UniProtKB/Swiss-Prot%3BAcc:Q9FKG1]
AT5G62560		PUB41	protein_coding	protein ubiquitination	U-box domain-containing protein 41 [Source:UniProtKB/Swiss-Prot%3BAcc:Q0WUF6]
AT5G62620		GALT6	protein_coding	arabinogalactan protein metabolic process	Hydroxyproline O-galactosyltransferase GALT6 [Source:UniProtKB/Swiss-Prot%3BAcc:Q9LV16]
AT5G63550			protein_coding	unknown	DEK domain-containing chromatin associated protein [Source:UniProtKB/TrEMBL%3BAcc:Q9FFQ8]
AT5G64310		AGP1	protein_coding	unknown	ATAGP1 [Source:UniProtKB/TrEMBL%3BAcc:A0A178UMN6]
AT5G65360		HTR2	protein_coding	unknown	Histone H3 [Source:UniProtKB/TrEMBL%3BAcc:A0A178WG20]
